# Supplementary material
Source: PubMed Central journal article supplement (PMC6143029)
Supplement: jamadermatol-154-1017-s001.pdf [file jamadermatol-154-1017-s001.pdf]

## Supplementary Online Content

Phan C, Touvier M, Kesse-Guyot E, et al. Association Between Mediterranean Anti-inflammatory Dietary Profile and Severity of Psoriasis: Results From the NutriNet-Santé Cohort. *JAMA Dermatol*. Published online July 25, 2018.  
doi:10.1001/jamadermatol.2018.2127

**eTable 1.** Self-questionnaire on psoriasis

**eTable 2.** Comparison of responders (n=35,735) with non-responders (n=146,321)

**eTable 3.** Multivariate analyses in the incident population

This supplementary material has been provided by the authors to give readers additional information about their work.

**eTable 1. Self-questionnaire on psoriasis**

|     |                                                                                                             |
|-----|-------------------------------------------------------------------------------------------------------------|
| Q1  | Do you have psoriasis?                                                                                      |
| Q2  | When did psoriasis first appear?                                                                            |
| Q3  | This psoriasis has been diagnosed by: a dermatologist, a (non dermatologist) doctor, a paramedic, yourself. |
| Q4  | Have you ever consulted a physician for psoriasis?                                                          |
| Q5  | Have you ever been hospitalized for psoriasis?                                                              |
| Q6  | If you <u>have</u> been hospitalized for psoriasis, in which year(s) was that?                              |
| Q7  | Have you ever been treated with psoriasis medications (tablets, injections, creams, etc.)?                  |
| Q8  | Is your psoriasis still active?                                                                             |
| Q9  | When did your psoriasis disappear?                                                                          |
| Q10 | Overall, how severity is or was your psoriasis? (Possible answers: severe or non-severe)                    |
| Q11 | What impact has psoriasis had on your daily life? (Possible answers: severe or non-severe)                  |

**eTable 2. Comparison of responders (n=35,735) with non-responders (n=146,321)**

| Psoriasis questionnaire              | Responders (n=35,735) | Non-responders (n=146,321) |
|--------------------------------------|-----------------------|----------------------------|
| <b>Sociodemographic variables</b>    |                       |                            |
| Age, mean (SD)                       | 47.5 (14.3)           | <b>42.4 (14.7)</b>         |
| Female (%)                           | 27,220 (76.2)         | 96,657 (77.8)              |
| BMI<25 (%)                           | 24,864 (69.7)         | 93,816 (67.8)              |
| 25≤BMI≤30 (%)                        | 7,835 (21.9)          | 29,862 (21.2)              |
| BMI>30 (%)                           | 2,985 (8.4)           | 14,720 (10.6)              |
| High physical activity (%)           | 10,999 (34.8)         | 35,592 (33)                |
| Moderate physical activity (%)       | 13,642 (43.2)         | 45,203 (41.9)              |
| Low physical activity (%)            | 6,934 (21.9)          | 26,997 (25)                |
| Never smokers (%)                    | 18,222 (51)           | 69,446 (48)                |
| Former smokers (%)                   | 12,914 (36.1)         | 46,564 (32.2)              |
| Current smokers (%)                  | 4,593 (12.8)          | <b>28,535 (19.7)</b>       |
| Primary education (%)                | 942 (2.8)             | 5,318 (3.9)                |
| Secondary education (%)              | 5,657 (17)            | 24,627 (17.7)              |
| Higher education (%)                 | 26,616 (80.1)         | 107,146 (78.3)             |
| <b>Medical history</b>               |                       |                            |
| Cardiovascular disease (%)           | 790 (2)               | 2,394 (1.9)                |
| Arterial hypertension (%)            | 4,058 (11.4)          | 11,305 (9.1)               |
| Diabetes (%)                         | 839 (2.3)             | 2,927 (2.3)                |
| Hypertriglyceridemia (%)             | 620 (1.7)             | 1,854 (1.5)                |
| CES-D (depression score), mean (SD)* | 10.3 (8.7)            | 10.1 (8.6)                 |

\* Depression is defined as a Center for Epidemiologic Studies Depression Scale (CES-D) score ≥16

**eTable 3. Multivariate analyses in the incident population**

| Model*                  | Severity of psoriasis *** | Tertile 1               | Tertile 2               | Tertile 3              | P trend | Continuous       | P linear |
|-------------------------|---------------------------|-------------------------|-------------------------|------------------------|---------|------------------|----------|
| MEDI-LITE score cut-off |                           | 0-7                     | 8-9                     | 10-18                  |         |                  |          |
|                         |                           | n=11093<br>OR** [95%CI] | n=10082<br>OR** [95%CI] | n=9707<br>OR** [95%CI] |         | OR** [95%CI]     |          |
| Model 1<br>(n=30,882)   | non-severe                | 1 (ref)                 | 1.02 (0.73-1.43)        | 1.02 (0.73-1.45)       | 0.8051  | 1.01 (0.95-1.07) | 0.8358   |
|                         | severe                    | 1 (ref)                 | 0.72 (0.38-1.36)        | 0.69 (0.36-1.33)       |         | 0.97 (0.86-1.09) |          |
| Model 2<br>(n=25,401)   | non-severe                | 1 (ref)                 | 1.06 (0.72-1.56)        | 1.13(0.76-1.68)        | 0.7034  | 1.03 (0.96-1.11) | 0.7112   |
|                         | severe                    | 1 (ref)                 | 0.65 (0.32-1.33)        | 0.99 (0.98-1.00)       |         | 0.98 (0.86-1.13) |          |
| Model 3<br>(n=25,401)   | non-severe                | 1 (ref)                 | 1.07 (0.73-1.56)        | 1.15 (0.78-1.72)       | 0.7105  | 1.03 (0.96-1.11) | 0.6765   |
|                         | severe                    | 1 (ref)                 | 0.66 (0.32-1.35)        | 0.69 (0.32-1.47)       |         | 0.99 (0.87-1.13) |          |
| Model 4<br>(n=21,180)   | non-severe                | 1 (ref)                 | 1.21 (0.74-1.97)        | 0.96 (0.55-1.66)       | 0.8597  | 0.97 (0.89-1.07) | 0.8685   |
|                         | severe                    | 1 (ref)                 | 0.75 (0.31-1.85)        | 0.87 (0.35-2.21)       |         | 1.01 (0.85-1.19) |          |

\* Model 1: adjusted for age and gender.

Model 2: adjusted for age, gender, BMI, smoking status, physical activity, and educational level.

Model 3: adjusted for age, gender, BMI, smoking status, physical activity, educational level, cardiovascular disease, diabetes, hypertension, and hypertriglyceridemia.

Model 4: adjusted for age, gender, BMI, smoking status, physical activity, educational level, cardiovascular disease, diabetes, hypertension, hypertriglyceridemia and depressive symptoms.

\*\*Odds ratios [95% confidence intervals] were estimated using multinomial logistic regression and adjusted for matching variables.

Tertile 1 was the reference category.

\*\*\*Reference is free-psoriasis group
